# Supplementary material
Source: Springer Nature journal article supplement (https://www.springermedizin.de/resource/supplementary/12889_2011_3526_MOESM2_ESM.pdf/9489232)

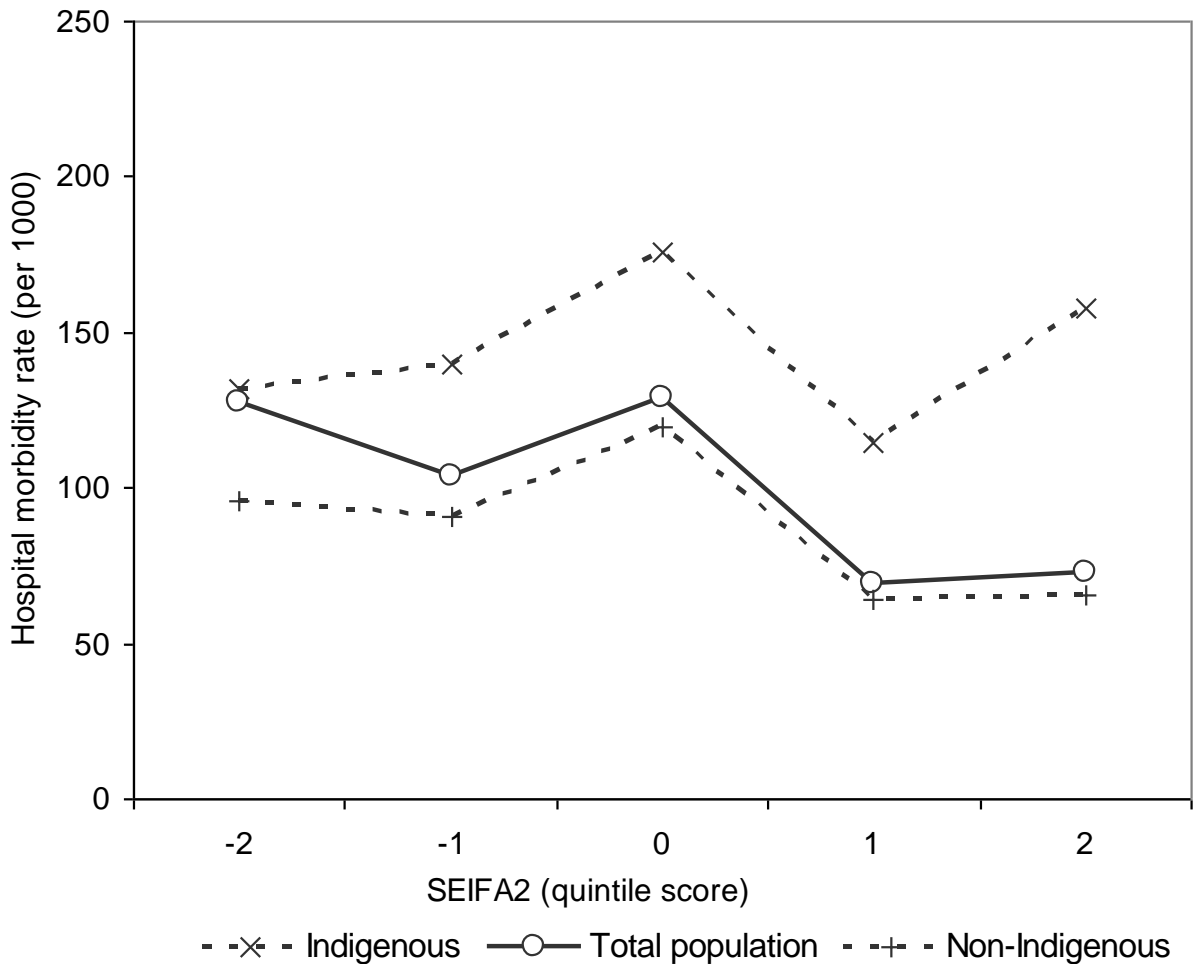

Note: SEIFA=Socio-economic indexes for areas

Supplement: MOESM2 [file 9489232]
